# Supplementary material for: Innovative 2D dioxonium vanadium oxide: enhancing stability in aqueous zinc-ion battery cathodes
Source: Royal Society of Chemistry journal article supplement (doi:10.1039/d4ra06871h), 2024-01-01
Supplement: d4ra06871h1.pdf [file d4ra06871h1.pdf]

## Supporting Information

### Innovative 2D Dioxonium Vanadium Oxide: Enhancing Stability in Aqueous Zinc-Ion Battery Cathodes

Yannis De Luna,<sup>1</sup> Zakiah Mohamed<sup>2</sup>, Abdulillah Dawoud,<sup>3</sup> Nasr Bensalah<sup>3,\*</sup>

<sup>1</sup> Materials Science and Technology Graduate Program, Department of Physics and Materials Science, Qatar University, Doha 2713, Qatar

<sup>2</sup> Faculty of Applied Science, Universiti Teknologi MARA, 40450 Shah Alam, Selangor, Malaysia

<sup>3</sup>Department of Chemistry and Earth Sciences, College of Arts and Science, Qatar University, PO Box 2713, Doha, Qatar

\*Corresponding author: [nasr.bensalah@qu.edu.qa](mailto:nasr.bensalah@qu.edu.qa)

**Table S1.** The estimated crystallite size of each crystal plane detected in XRD for as-prepared  $V_3O_8(H_3O)_2$  cathode material.

| Crystal plane | 2 $\theta$ (degrees) | D (nm) |
|---------------|----------------------|--------|
| (001)         | 15.97                | 250.7  |
| (111)         | 21.51                | 210.6  |
| (120)         | 22.38                | 126.6  |
| (021)         | 25.55                | 182.0  |
| (121)         | 27.57                | 142.1  |
| (220)         | 28.24                | 320.0  |
| (130)         | 31.82                | 322.7  |
| (002)         | 32.17                | 353.3  |
| (131)         | 35.76                | 107.0  |
| (230)         | 36.71                | 76.6   |
| (122)         | 39.53                | 90.2   |

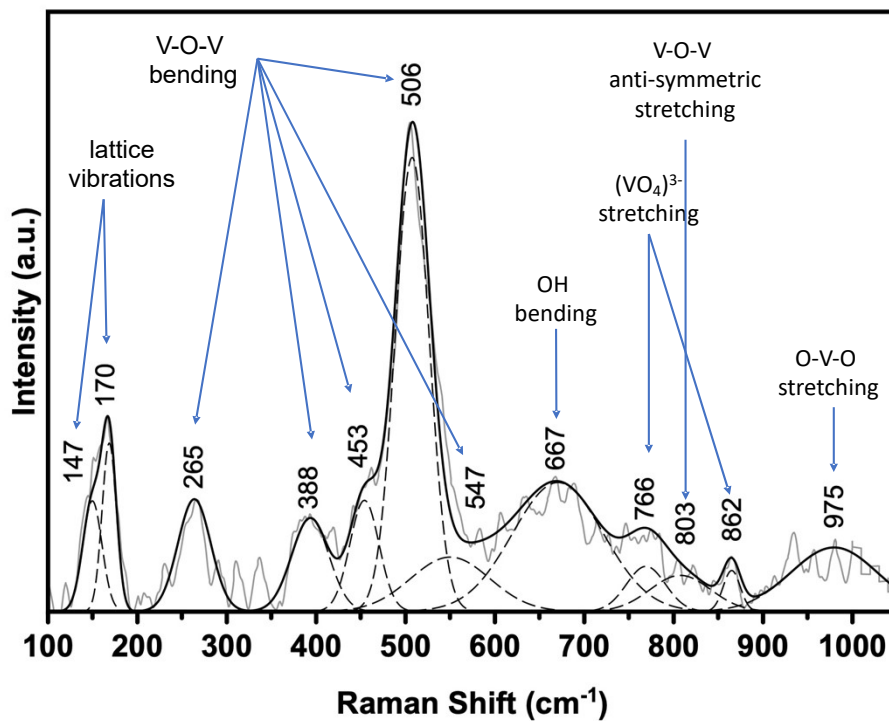

**Figure S1.** Raman spectrum of as-prepared VO-H<sub>3</sub>O cathode material.

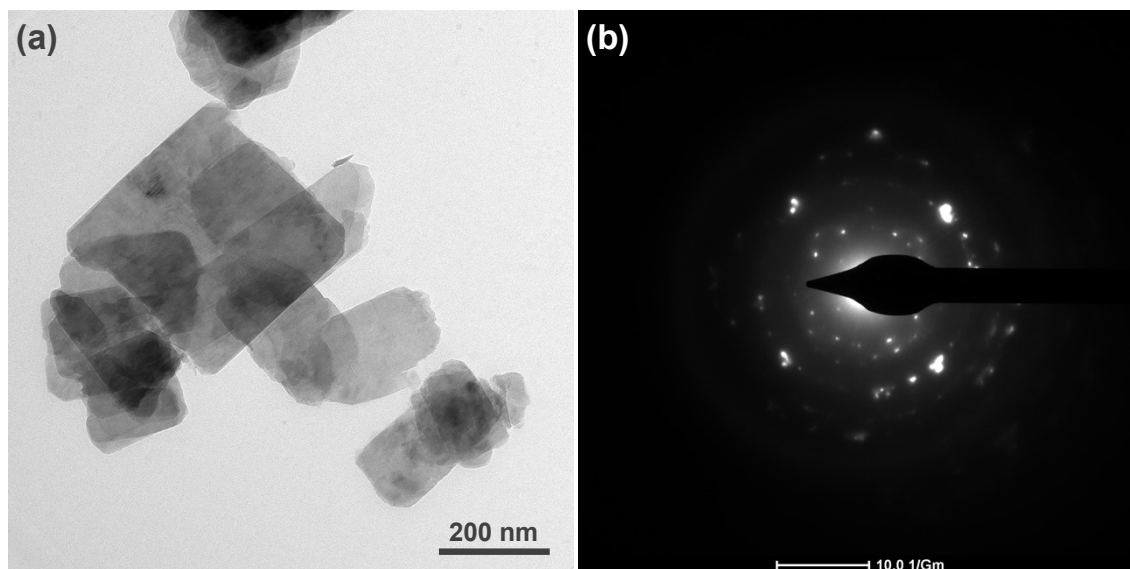

**Figure S2.** (a) TEM image and (b) SAED pattern of as-prepared layered VO-H<sub>3</sub>O cathode material.

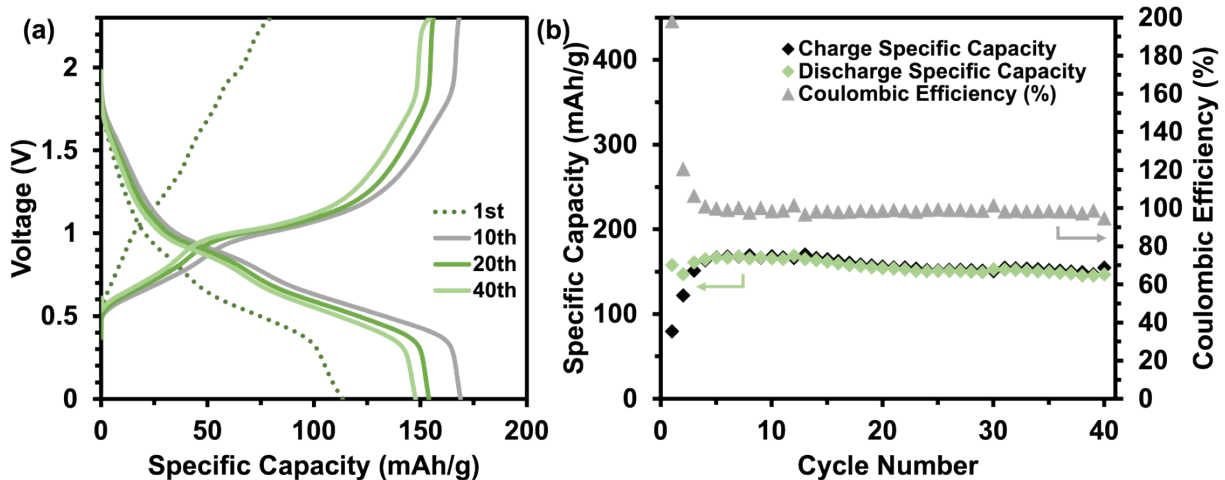

**Figure S3.** (a) GCD curves and (b) cycling performance of VO-H<sub>3</sub>O in half-cells against Zn/Zn<sup>2+</sup> with 3 M ZnSO<sub>4</sub>·7H<sub>2</sub>O aqueous electrolytes at 0.1 A g<sup>-1</sup>.

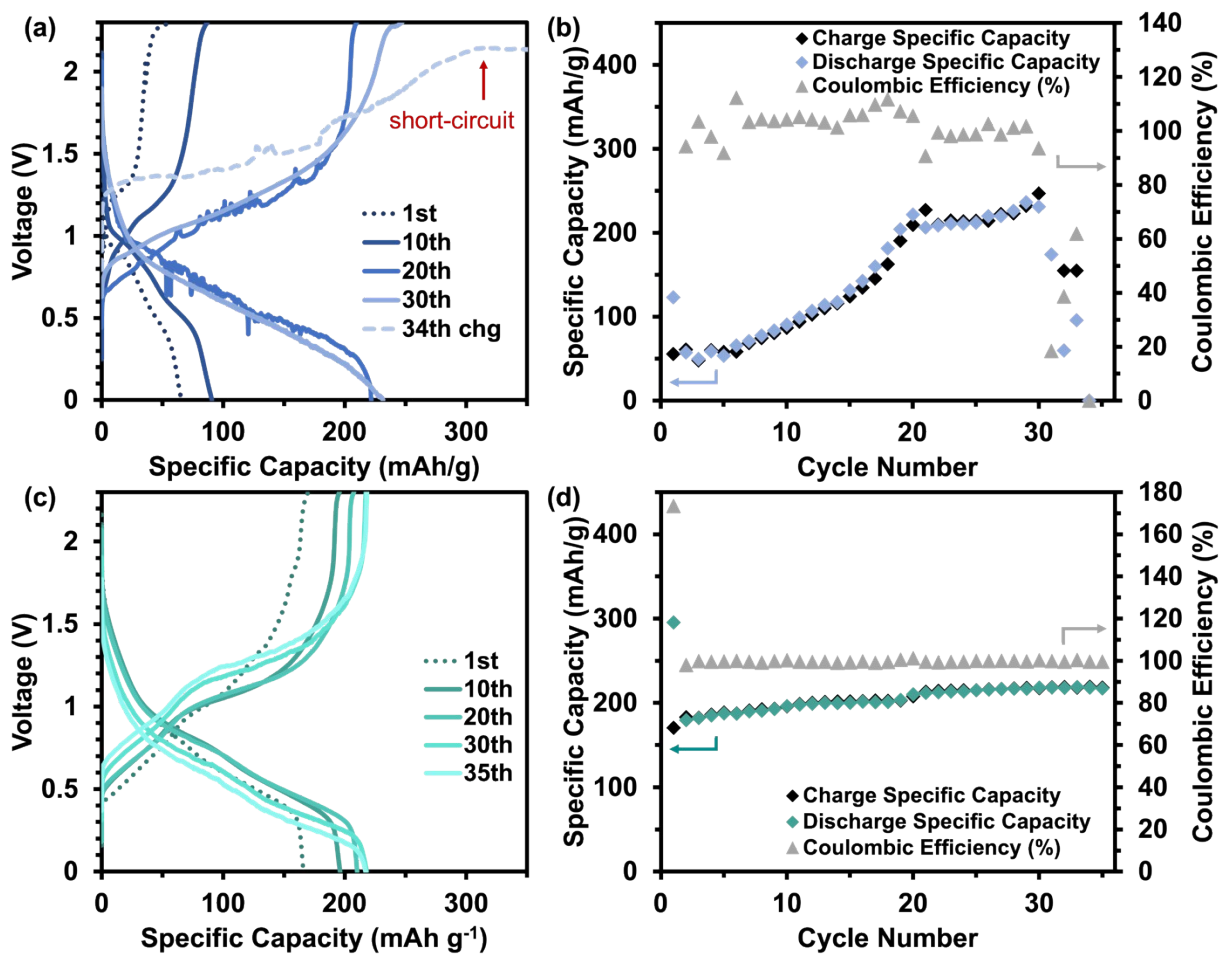

**Figure S4.** GCD curves and cycling performance of (a,b) V<sub>2</sub>O<sub>5</sub> and (c,d) VO-H<sub>3</sub>O in half-cells against Zn/Zn<sup>2+</sup> with 3 M Zn(CF<sub>3</sub>SO<sub>3</sub>)<sub>2</sub> aqueous electrolyte at 0.05 A g<sup>-1</sup>.

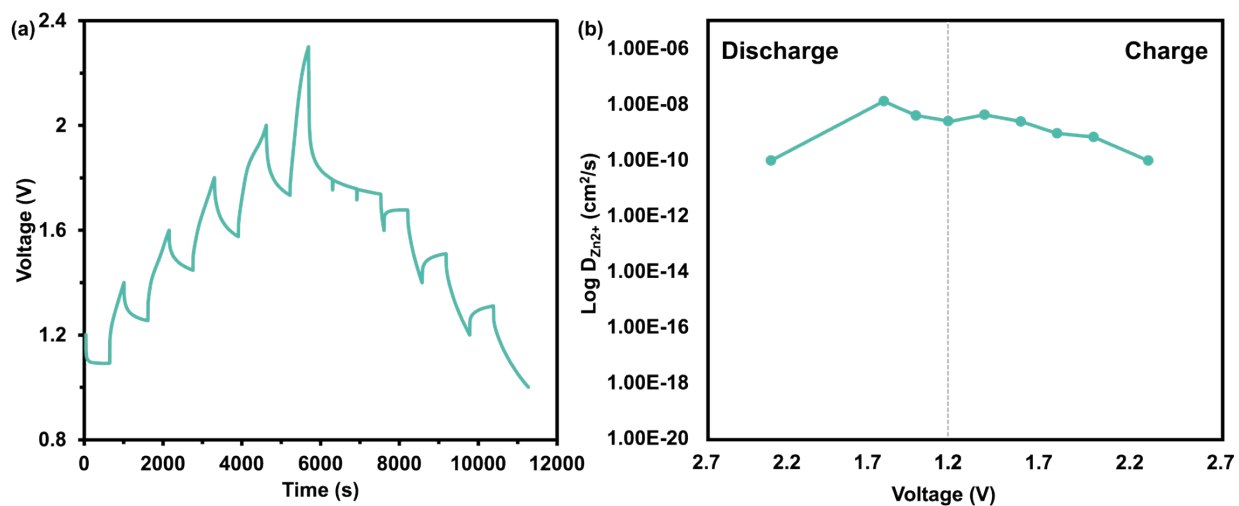

**Figure S5.** (a) GITT profile of VO-H<sub>3</sub>O in half-cells against Zn/Zn<sup>2+</sup> with 3 M Zn(CF<sub>3</sub>SO<sub>3</sub>)<sub>2</sub> aqueous electrolyte at 0.05 A g<sup>-1</sup> and (b) plot of diffusion coefficient of Zn<sup>2+</sup> ions against voltage during discharge and charge.

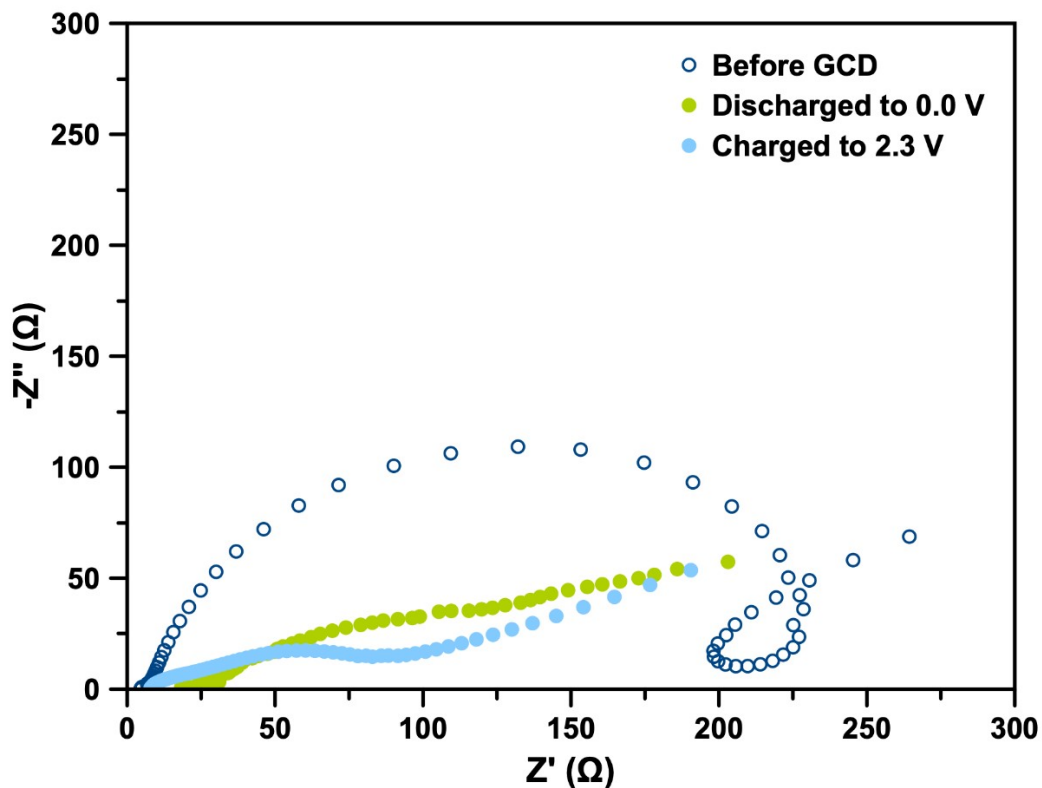

**Figure S6.** EIS analysis of VO-H<sub>3</sub>O half-cell against Zn/Zn<sup>2+</sup> in 3 m Zn(CF<sub>3</sub>SO<sub>3</sub>)<sub>2</sub> electrolyte before and after being discharged/charged.

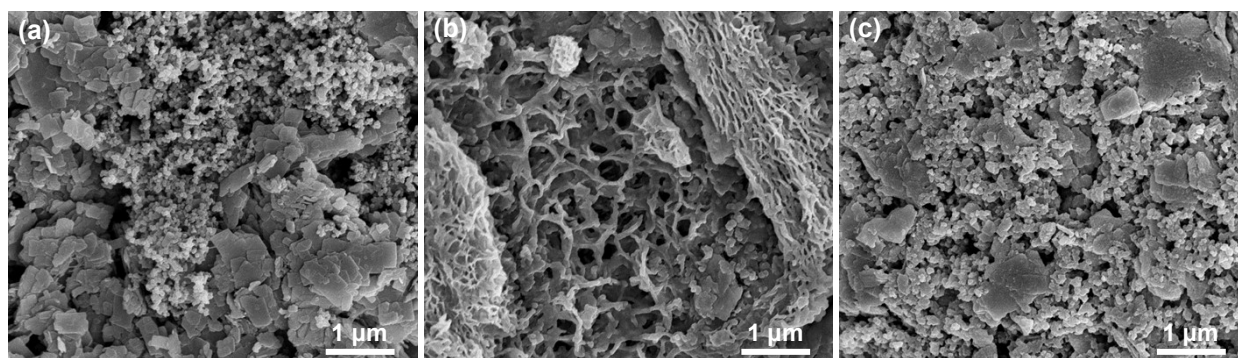

**Figure S7.** SEM images of VO-H<sub>3</sub>O half-cell with 3 m ZnSO<sub>4</sub>·7H<sub>2</sub>O electrolyte in the (a) pristine condition, (b) discharged (0.0 V), and (c) charged (2.3 V) states.

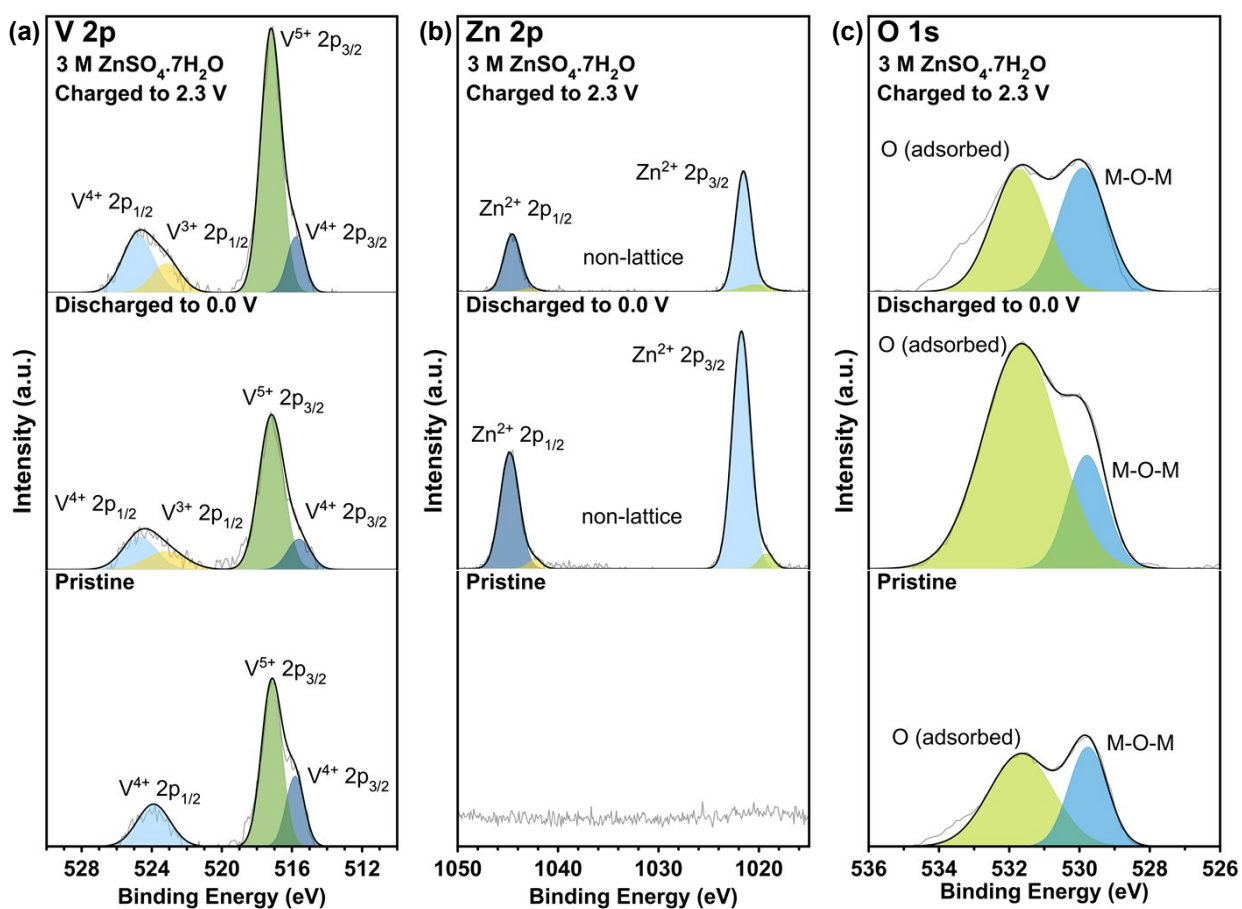

**Figure S8.** XPS analysis of (a) V 2p, (b) Zn 2p, (c) O 1s orbitals for VO-H<sub>3</sub>O half-cell with 3 m ZnSO<sub>4</sub>·7H<sub>2</sub>O electrolyte at pristine, discharged, and charged states.
